# Supplementary material
Source: PubMed Central journal article supplement (PMC3555527)

## SUPPLEMENTARY DATA

TABLE S1. Perianth traits of two different population types, Guadalquivir river Basin–Strait of Gibraltar and Sebou river Basin, of *Narcissus papyraceus*.

| Variable (mm)    | Guadalquivir river Basin and Strait of Gibraltar |              |                    | Sebou river Basin |              |                   | Differences between regions |
|------------------|--------------------------------------------------|--------------|--------------------|-------------------|--------------|-------------------|-----------------------------|
|                  | L                                                | S            | <i>P</i> -value    | L                 | S            | <i>P</i> -value   | <i>P</i> -value             |
| Corolla diameter | 30.79 ± 4.64                                     | 30.81 ± 5.93 | 0.980              | 36.25 ± 4.77      | 37.63 ± 4.49 | 1.00 <sup>◊</sup> | <0.0001                     |
| Tube length      | 14.63 ± 1.79                                     | 14.79 ± 2.08 | 0.260              | 20.93 ± 2.61      | 20.89 ± 2.58 | 0.95              | <0.0001                     |
| Corona diameter  | 6.82 ± 1.29                                      | 6.54 ± 1.35  | 0.002 <sup>◊</sup> | 6.62 ± 1.19       | 6.63 ± 1.18  | 0.16              | 0.002                       |
| Corona length    | 3.87 ± 0.63                                      | 3.84 ± 0.69  | 0.57 <sup>◊</sup>  | 3.81 ± 0.71       | 3.89 ± 0.76  | 0.76              | 0.103                       |
| Tube diameter    | 4.34 ± 0.55                                      | 4.58 ± 0.60  | 1.00 <sup>◊</sup>  | 4.02 ± 0.60       | 4.10 ± 0.76  | 0.14              | <0.0001                     |

Differences between morphs and populations were calculated by Student's *t* test, except <sup>◊</sup> calculated by Wilcoxon rank sum test.

TABLE S2. Results of ANCOVA models for the effects of flower tube length (covariate) on different response variables related to sex organs, according to morph (L, S), and population type (Guadalquivir – Strait of Gibraltar vs Sebou river; see text for details).

|                                        | SS      | d.f. | F        | P       |
|----------------------------------------|---------|------|----------|---------|
| Response variable: Style length        |         |      |          |         |
| Flower tube                            | 595.672 | 1    | 246.1776 | <0.0001 |
| Morph                                  | 25.9646 | 1    | 10.7306  | 0.0011  |
| PopType                                | 15.8268 | 1    | 5.7349   | 0.0172  |
| Pob[PopType]                           | 270.706 | 9    | 12.4307  | <0.0001 |
| Flower tube*Morph                      | 99.6097 | 1    | 41.1664  | <0.0001 |
| Flower tube*PopType                    | 0.02457 | 1    | 0.0102   | 0.9198  |
| Flower tube*Morph*PopType              | 1.25283 | 1    | 0.5178   | 0.472   |
| Response variable: Upper anther height |         |      |          |         |
| Flower tube                            | 2237.1  | 1    | 3040.377 | <0.0001 |
| Morph                                  | 0.447   | 1    | 0.6075   | 0.436   |
| PopType                                | 0.94774 | 1    | 1.0937   | 0.2966  |
| Pob[PopType]                           | 102.319 | 9    | 15.451   | <0.0001 |
| Flower tube*Morph                      | 0.36834 | 1    | 0.5006   | 0.4794  |
| Flower tube*PopType                    | 4.17456 | 1    | 5.6735   | 0.0174  |
| Flower tube*Morph*PopType              | 0.31253 | 1    | 0.4247   | 0.5148  |
| Response variable: Lower anther height |         |      |          |         |
| Flower tube                            | 1393.63 | 1    | 1152.739 | <0.0001 |
| Morph                                  | 0.3677  | 1    | 0.3041   | 0.5814  |
| PopType                                | 1.32241 | 1    | 0.9501   | 0.3304  |
| Pob[PopType]                           | 144.762 | 9    | 13.3044  | <0.0001 |
| Flower tube*Morph                      | 2.5192  | 1    | 2.0838   | 0.1493  |
| Flower tube*PopType                    | 12.0732 | 1    | 9.9863   | 0.0016  |
| Flower tube*Morph*PopType              | 0.10334 | 1    | 0.0855   | 0.7701  |

FIG. S1. Some of the pollinators captured during nocturnal and diurnal observations of *Narcissus papyraceus*. (A, B) Short-tongued pollinator (*Anthophora* sp.) in flowers from the Guadalquivir river Basin–Strait Gibraltar and Sebou river Basin populations, respectively. (C) Long-tongued pollinator (*Autographa gamma*) in a flower from Guadalquivir river Basin–Strait Gibraltar. (D) Empty anthers of *N. papyraceus* flower after being foraged by an *Andrena* sp. bee.

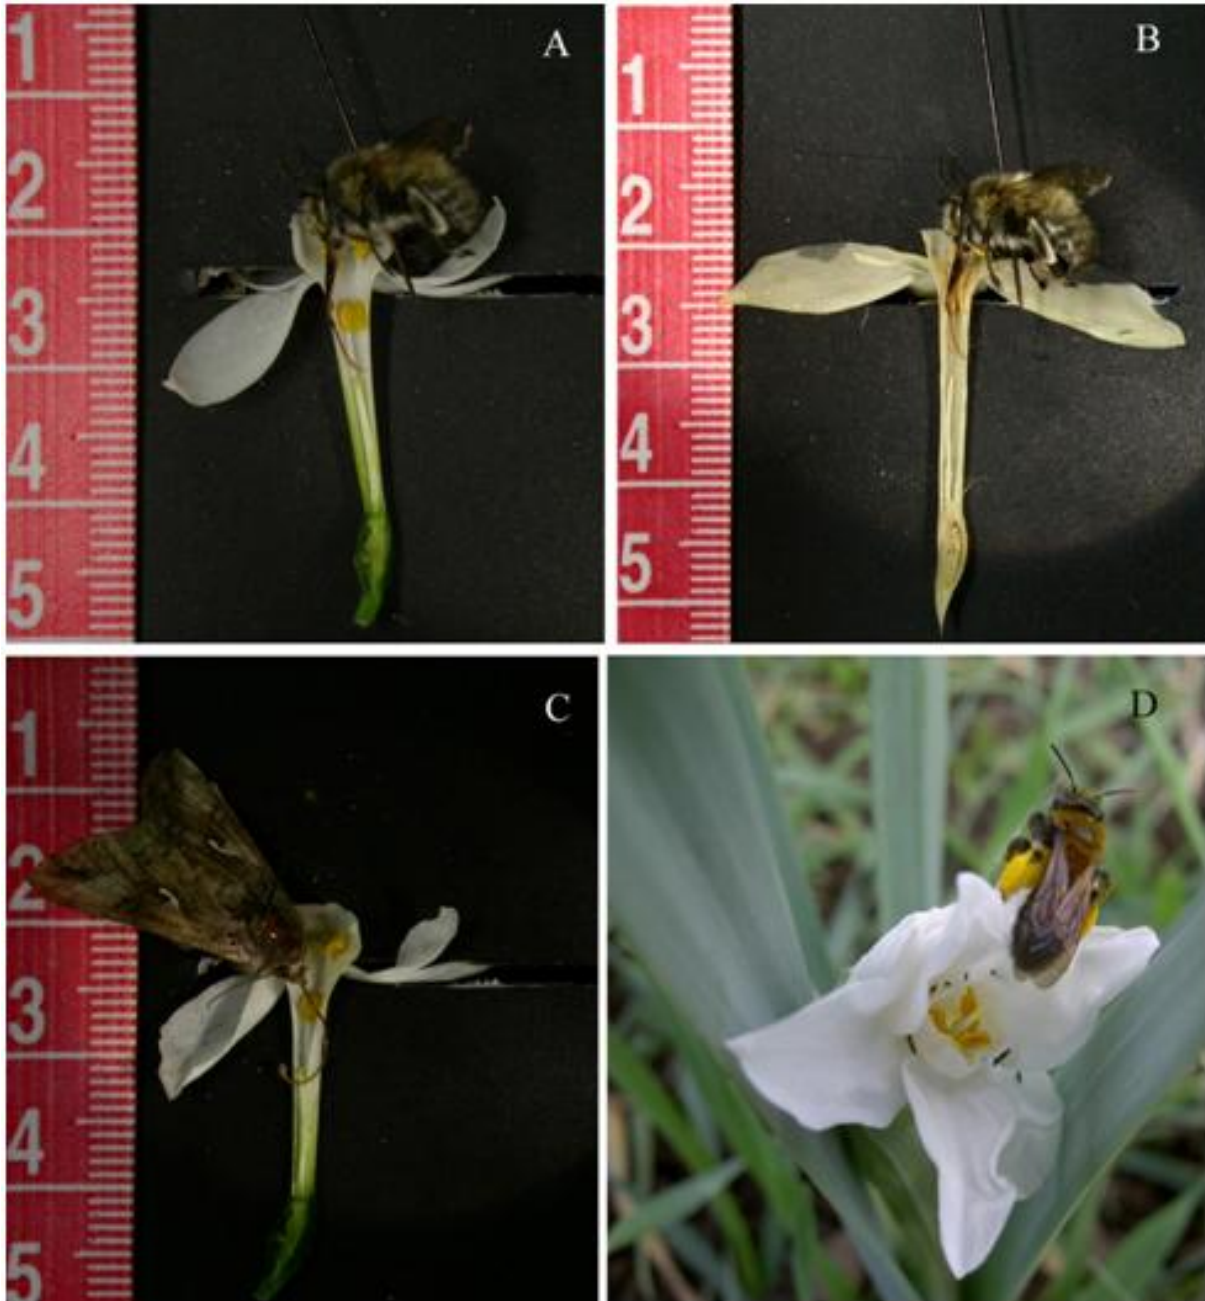

FIG. S2. Stigma–anther separation between reciprocal flowers of Guadalquivir river Basin–Strait Gibraltar (small-flowered) and Sebou river Basin (large-flowered) populations of *Narcissus papyraceus*.

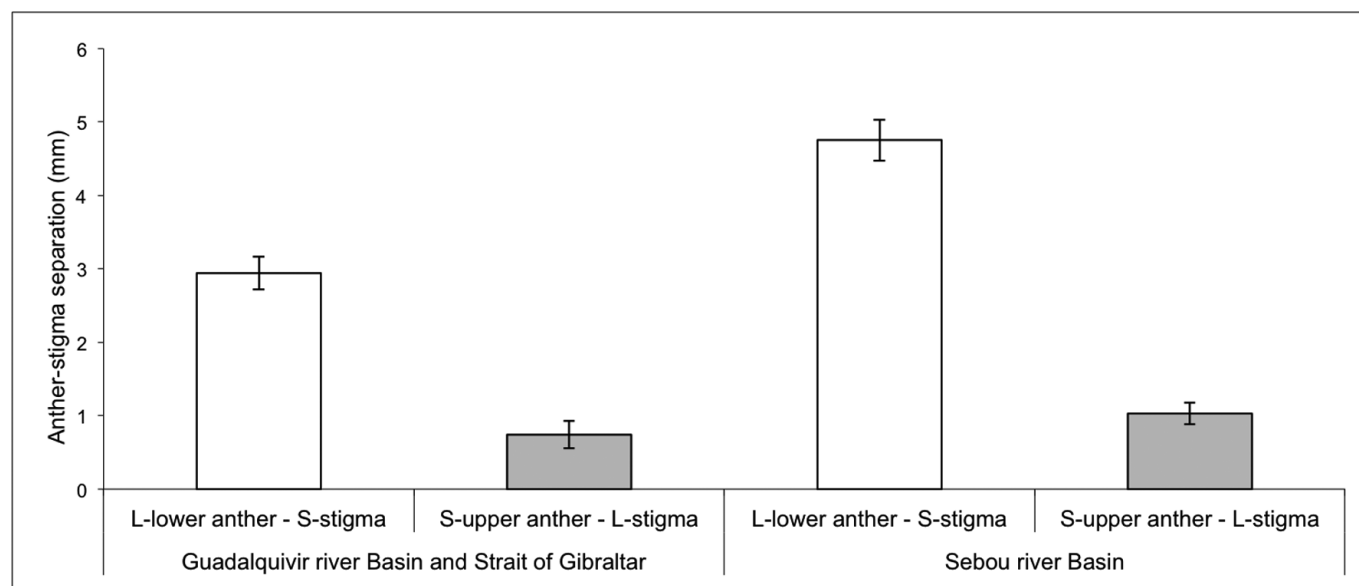

Supplement: supp_mcs261_mcs261supp.pdf [file supp_mcs261_mcs261supp.pdf]
